# Supplementary material for: Growth modulation of nonlayered 2D-MnTe and MnTe/WS2 heterojunctions for high-performance photodetectors
Source: Royal Society of Chemistry journal article supplement (doi:10.1039/d2tc03853f), 2022-12-24
Supplement: d2tc03853f1.pdf [file d2tc03853f1.pdf]

# Supporting Information

## **Growth modulation of nonlayered 2D-MnTe and MnTe/WS<sub>2</sub> heterojunction for high-performance photodetector**

*Taikun Wang<sup>a,b</sup>, Fapeng Sun<sup>a,b,c</sup>, Wenting Hong<sup>a,b</sup>, Chuanyong Jian<sup>a,b</sup>, Qinkun Ju<sup>a,b,c</sup>,*

*Xu He<sup>a,b\*</sup>, Qian Cai<sup>a,b</sup>, Wei Liu<sup>a,b\*</sup>*

<sup>a</sup>CAS Key Laboratory of Design and Assembly of Functional Nanostructures, and Fujian Provincial Key Laboratory of Nanomaterials, Fujian Institute of Research on the Structure of Matter, Chinese Academy of Sciences, Fuzhou, Fujian, 350002, China

<sup>b</sup>Fujian Science & Technology Innovation Laboratory for Optoelectronic Information of China, Fuzhou, Fujian 350108, P. R. China

<sup>c</sup>University of Chinese Academy of Sciences, Beijing, 100049, China

*E-mail: hexu@fjirsm.ac.cn, liuw@fjirsm.ac.cn*

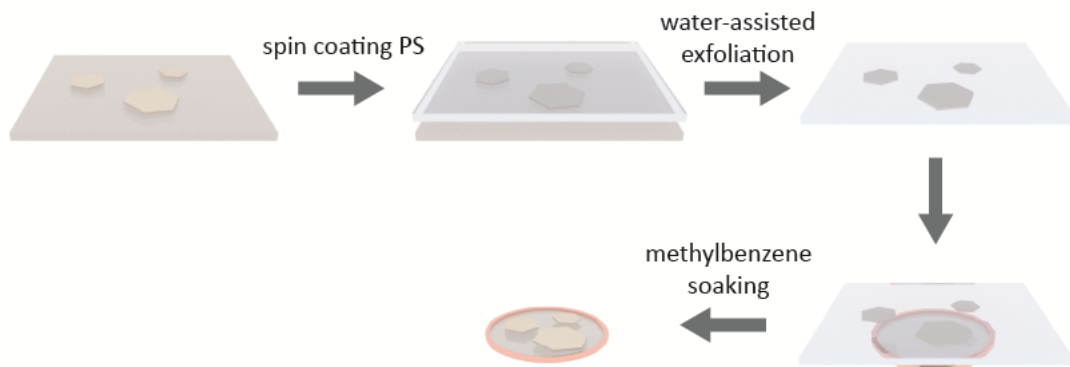

Figure S1. Schematic diagram of the process to transfer MnTe nanosheets onto a copper mesh.

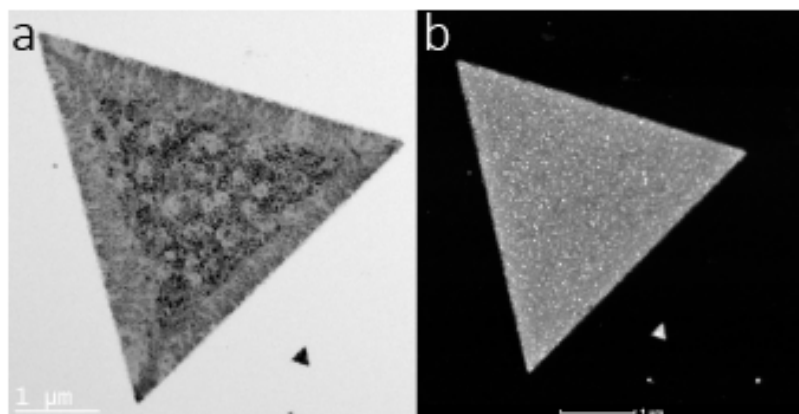

Figure S2. Low-magnification transmission electron microscopy images (a) and high-angle annular dark-field (HAADF) image (b) of MnTe nanosheet.

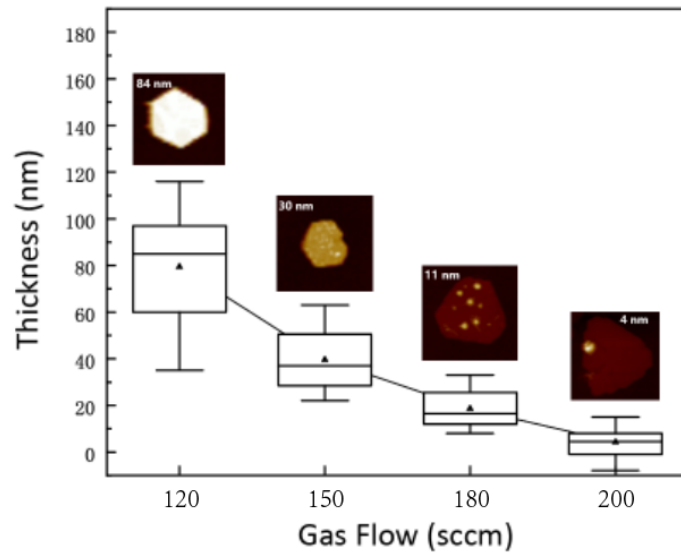

Figure S3. The average thickness of MnTe nanosheets grown at different gas flows.

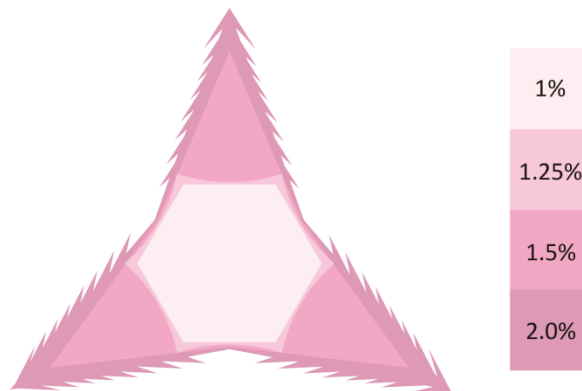

Figure S4. Morphological evolution of MnTe nanosheets as single-domain net growth rate increases.

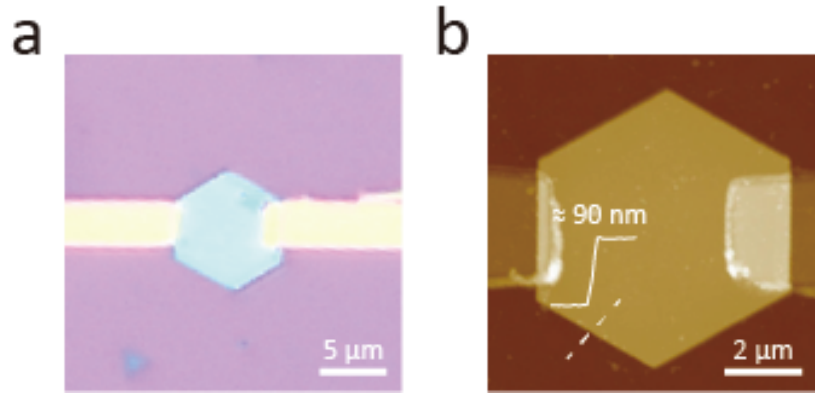

Figure S5. The optical microscopy image (a) and the AFM image (b) of MnTe-based FET device.

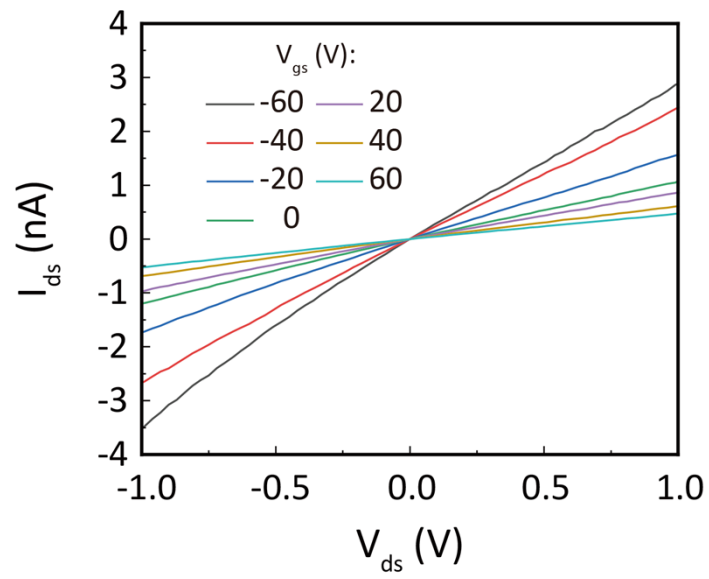

Figure S6.  $I_{ds}$ - $V_{ds}$  output characteristics of MnTe-based FET.

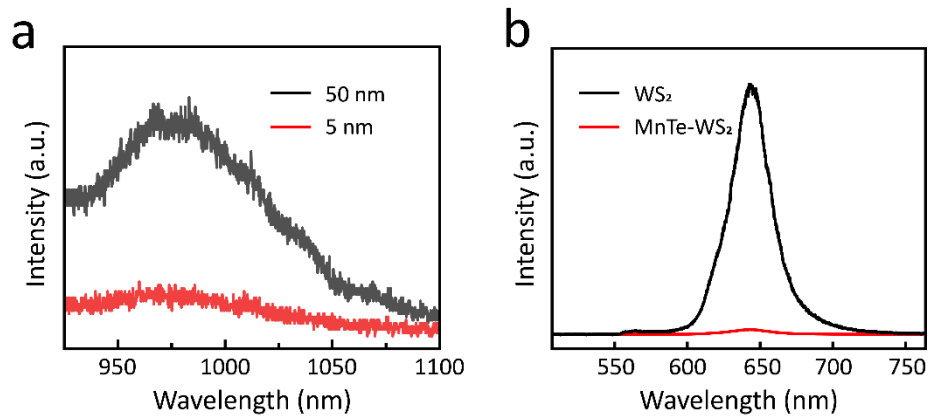

Figure S7. (a) PL spectra of MnTe nanosheets with different thicknesses. (b) PL spectra of a few layers of WS<sub>2</sub> nanosheets and MnTe/WS<sub>2</sub> heterostructure.

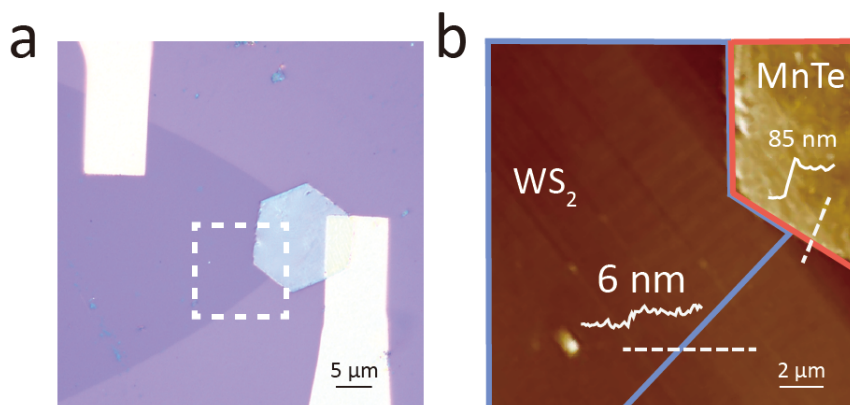

Figure S8. The optical microscopy image (a) and the AFM image (b) of MnTe-WS<sub>2</sub> heterojunction photodetector device.

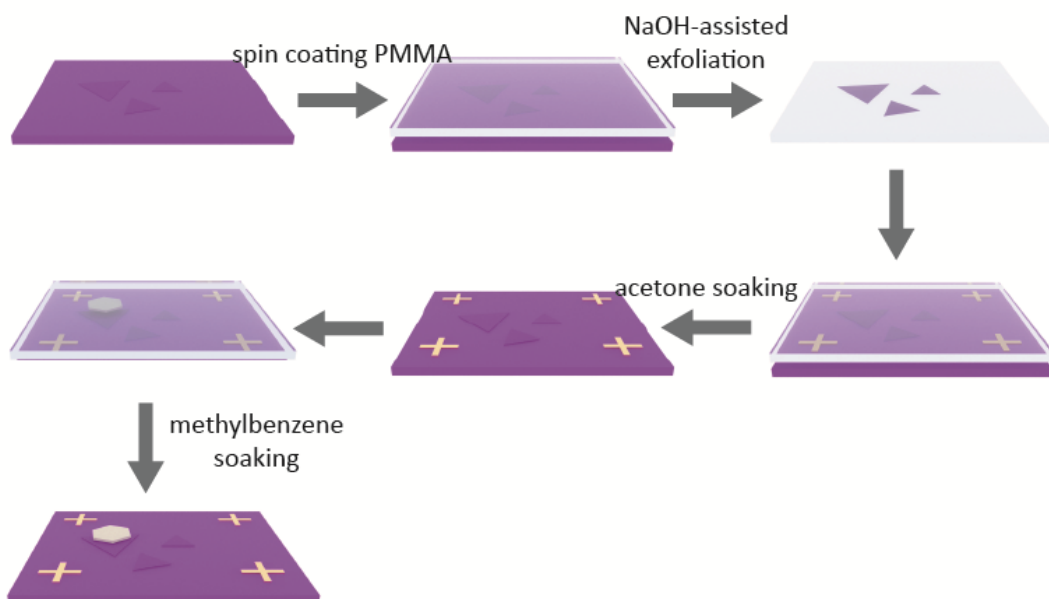

Figure S9. Schematic diagram of the process to fabricate the MnTe/WS<sub>2</sub> photodetector.

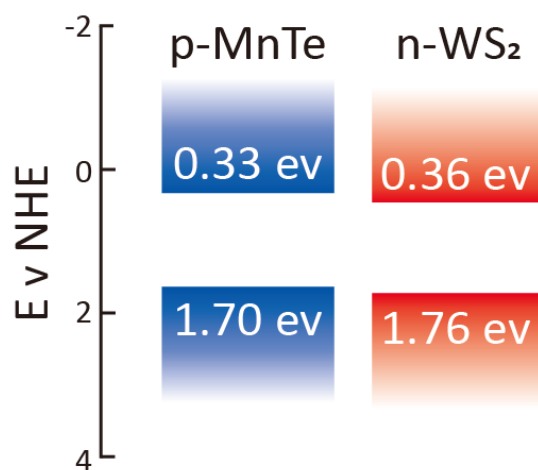

Figure S10. Band alignment of MnTe/WS<sub>2</sub> heterojunction.

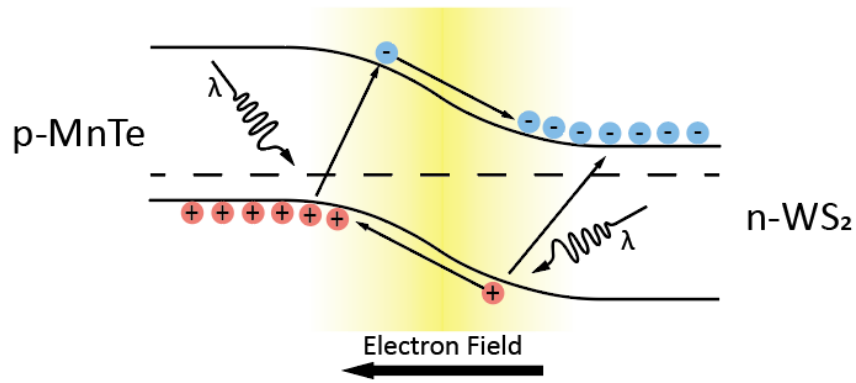

Figure S11. The mechanism diagram of MnTe-WS<sub>2</sub> heterojunction photodetector.

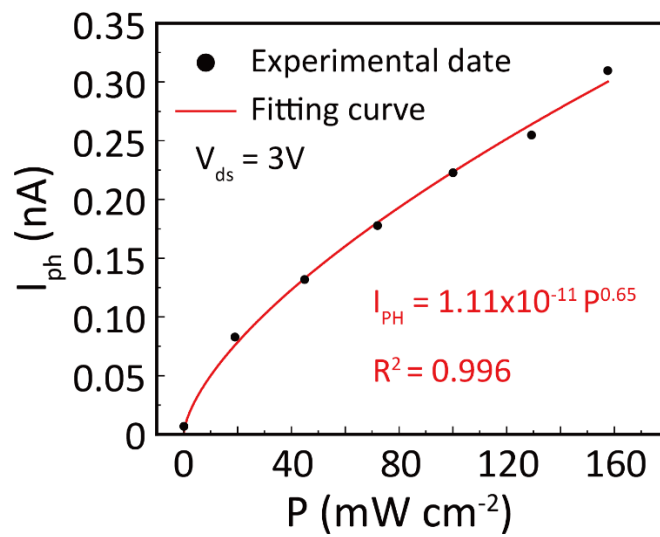

Figure S12. The fitted curve of power density vs. photocurrent.

Table S1. Comparison of the photodetector performance with other 2D heterostructures.

| Materials                           | Method                | Wavelength (nm) | Photoresponsivity ( $A W^{-1}$ ) | Detectivity (Jones)   | Reference |
|-------------------------------------|-----------------------|-----------------|----------------------------------|-----------------------|-----------|
| MnTe/WS <sub>2</sub>                | CVD-restacking        | 637             | 0.271                            | $1.23 \times 10^{10}$ | This work |
| WS <sub>2</sub> /MoS <sub>2</sub>   | CVD                   | 532             | 0.00436                          | $4.36 \times 10^{13}$ | 1         |
| WSe <sub>2</sub> /SnS <sub>2</sub>  | CVD                   | 520             | 0.108                            | $4.71 \times 10^{10}$ | 2         |
| GaSe/MoS <sub>2</sub>               | CVD                   | 300             | 0.065                            | -                     | 3         |
| GaSe/MoSe <sub>2</sub>              | CVD                   | white light     | 0.03                             | -                     | 4         |
| SnS <sub>2</sub> /MoS <sub>2</sub>  | CVD                   | 638             | 1.36                             | -                     | 5         |
| GaSe/Gasb                           | MBE                   | 637             | 0.1                              | $2.2 \times 10^{12}$  | 6         |
| ReS <sub>2</sub> /ReSe <sub>2</sub> | Exfoliated-restacking | 550             | 0.021                            | -                     | 7         |
| MoTe <sub>2</sub> /MoS <sub>2</sub> | Exfoliated-restacking | 473             | 0.06                             | $1.60 \times 10^{10}$ | 8         |
| BP/InSe                             | Exfoliated-restacking | 455             | 0.017                            | -                     | 9         |

## References

- 1 W. Wu, Q. Zhang, X. Zhou, L. Li, J. Su, F. Wang and T. Zhai, *Nano Energy*, 2018, **51**, 45-53.
- 2 T. Yang, B. Zheng, Z. Wang, T. Xu, C. Pan, J. Zou, X. Zhang, Z. Qi, H. Liu, Y. Feng, W. Hu, F. Miao, L. Sun, X. Duan and A. Pan, *Nat Commun*, 2017, **8**, 1906.
- 3 N. Zhou, R. Wang, X. Zhou, H. Song, X. Xiong, Y. Ding, J. Lu, L. Gan and T. Zhai, *Small*, 2018, **14**.
- 4 X. F. Li, M. W. Lin, J. H. Lin, B. Huang, A. A. Puretzky, C. Ma, K. Wang, W. Zhou, S. T. Pantelides, M. F. Chi, I. Kravchenko, J. Fowlkes, C. M. Rouleau, D. B. Geohegan and K. Xiao, *Science Advances*, 2016, **2**, e1501882.
- 5 B. Li, L. Huang, M. Zhong, Y. Li, Y. Wang, J. Li and Z. Wei, *Advanced Electronic Materials*, 2016, **2**.
- 6 P. Wang, S. Liu, W. Luo, H. Fang, F. Gong, N. Guo, Z. G. Chen, J. Zou, Y. Huang, X. Zhou, J. Wang, X. Chen, W. Lu, F. Xiu and W. Hu, *Adv Mater*, 2017, **29**.
- 7 A.-J. Cho, S. D. Namgung, H. Kim and J.-Y. Kwon, *APL Materials*, 2017, **5**.
- 8 F. Wang, L. Yin, Z. X. Wang, K. Xu, F. M. Wang, T. A. Shifa, Y. Huang, C. Jiang and J. He, *Advanced Functional Materials*, 2016, **26**, 5499-5506.
- 9 S. Zhao, J. Wu, K. Jin, H. Ding, T. Li, C. Wu, N. Pan and X. Wang, *Advanced Functional Materials*, 2018, **28**.
